# Supplementary material for: Deep Learning for Automated Elective Lymph Node Level Segmentation for Head and Neck Cancer Radiotherapy
Source: MDPI journal article supplement (doi:10.3390/cancers14225501), 2022-11-09
Supplement: s1 [file s1]

# Supplementary Materials: Deep Learning for Automated Elective Lymph Node Level Segmentation for Head and Neck Cancer Radiotherapy

Victor I. J. Strijbis, Max Dahele, Oliver J. Gurney-Champion, Gerrit J. Blom, Marije R. Vergeer, Berend J. Slotman and Wilko F. A. R. Verbakel

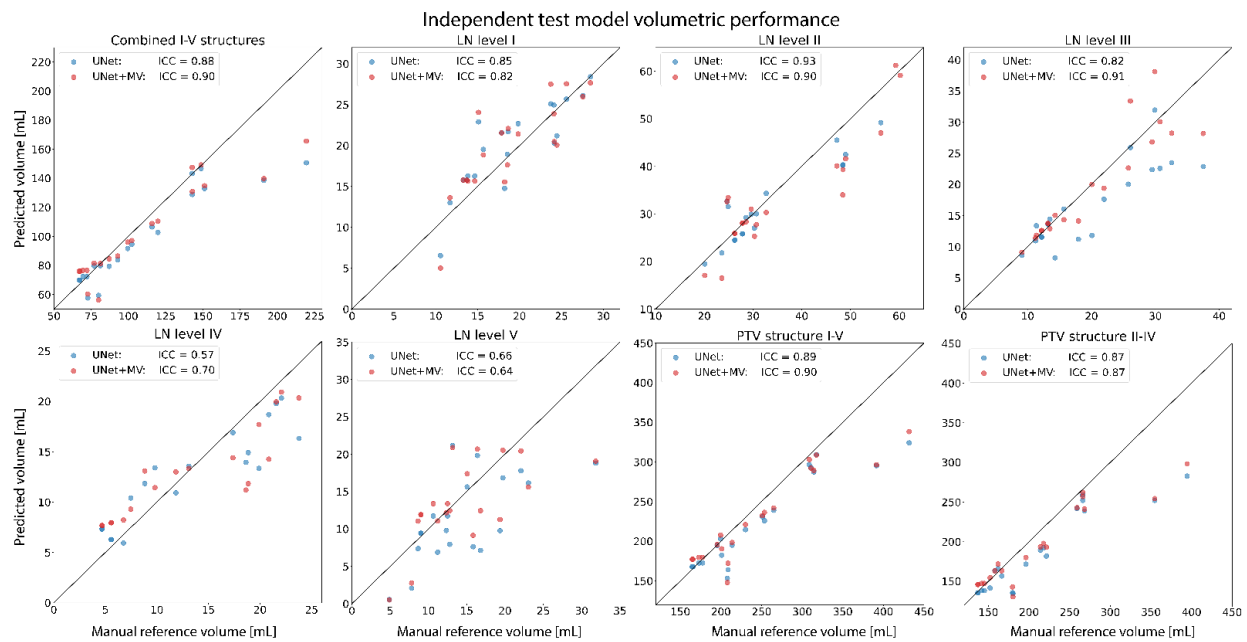

**Figure S1:** Predicted and manual reference volumes for all structures resulting from the independent test set. Abbreviations: ICC: intra-class correlation (two-way mixed, single measures, consistency).

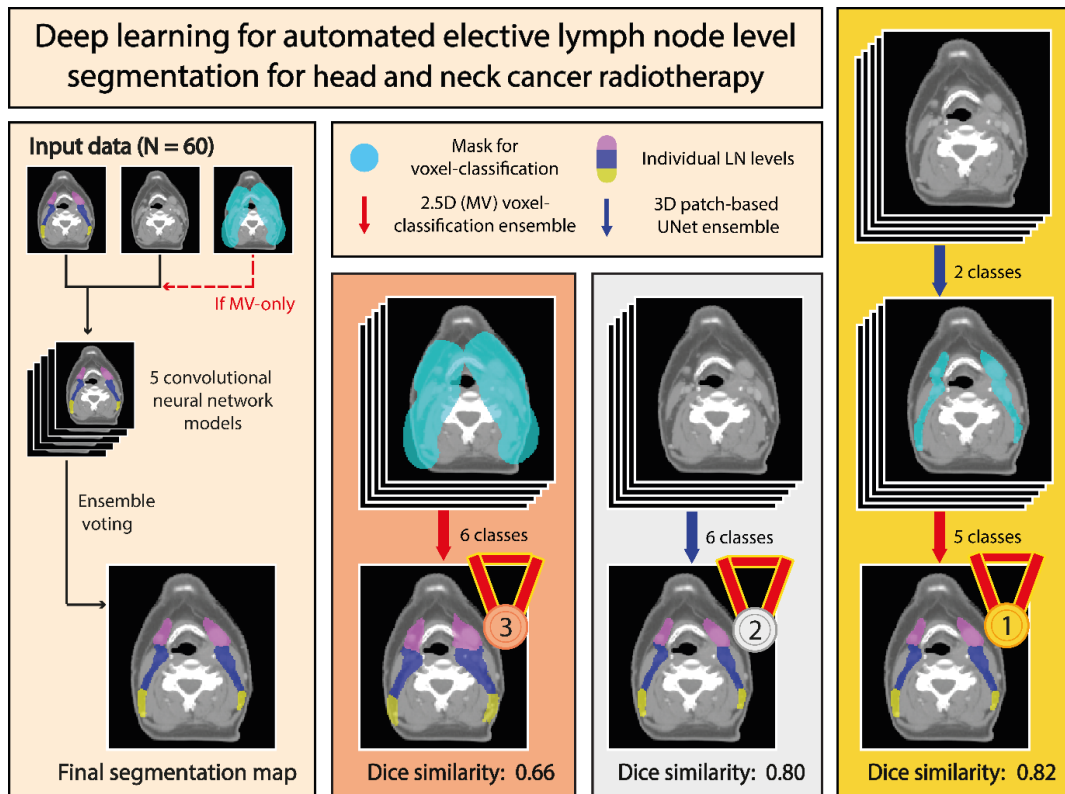

**Figure S2:** Graphical summary of the proposed work.
